# Supplementary material
Source: PubMed Central journal article supplement (PMC6647334)
Supplement: ao8b02207_si_001.pdf [file ao8b02207_si_001.pdf]

**Glycoproteomic profiling provides candidate MI predictors  
of later progression to heart failure**

Kristine Y DeLeon-Pennell PhD<sup>1,2\*</sup>, Osasere K Ero MBBS<sup>1</sup>, Yonggang Ma PhD<sup>1</sup>,  
Rugmani Padmanabhan Iyer PhD<sup>1</sup>, Elizabeth R Flynn BS<sup>1</sup>, Ingrid Espinoza PhD<sup>3</sup>,  
Solomon K. Musani PhD<sup>4</sup>, Ramachandran S Vasam MD<sup>5</sup>, Michael E Hall MD, MS<sup>1,4,6</sup>,  
Ervin R Fox MD, MPH<sup>4,6</sup>, and Merry L Lindsey PhD<sup>1,2\*</sup>

<sup>1</sup>Mississippi Center for Heart Research, Department of Physiology and Biophysics, UMMC,  
Jackson, MS; <sup>2</sup>Research Service, G.V. (Sonny) Montgomery Veterans Affairs Medical Center,  
Jackson, MS; <sup>3</sup>Department of Preventive Medicine and Cancer Institute, UMMC, Jackson, MS;  
<sup>4</sup>Jackson Heart Study, UMMC, Jackson, MS; <sup>5</sup>Preventive Medicine and Epidemiology and  
Cardiology, Department of Medicine, Boston University School of Medicine; and <sup>6</sup>Division of  
Cardiology, UMMC, Jackson, MS

**\*Corresponding author information:**

|                                                               |    |                                                                 |
|---------------------------------------------------------------|----|-----------------------------------------------------------------|
| Kristine Y. DeLeon-Pennell, Ph.D.                             | or | Merry L. Lindsey, Ph.D.                                         |
| (phone) 843-789-6839                                          |    | (phone) 601-815-1329                                            |
| (fax) 843-876-5068                                            |    | (fax) 601-984-1817                                              |
| Email: <a href="mailto:deleonky@umc.edu">deleonky@umc.edu</a> |    | Email: <a href="mailto:mllindsey@umc.edu">mllindsey@umc.edu</a> |

Department of Physiology and Biophysics  
University of Mississippi Medical Center  
2500 North State St., Jackson, MS 39216-4505, USA.

Short title: Glycoproteomic profiling provides indicators of heart failure

## **Supporting Information**

**Table S1.** Regression analysis of mass spectroscopy peak intensity values versus densitometry of protein measured by immunoblotting. Protein quantification correlated with peak intensity of proteins identified by mass spectroscopy and showed a positive relationship between the two methods.

| Accession # | Protein Name                      | Densitometry |            | Correlation |         |
|-------------|-----------------------------------|--------------|------------|-------------|---------|
|             |                                   | MI           | MI+HF      | r           | p value |
| 31377806    | Polymeric immunoglobulin receptor | 0.62±0.01    | 1.11±0.40  | 0.663       | <0.0001 |
| 4502511     | Complement C9                     | 8.81±0.92    | 13.38±1.58 | 0.499       | <0.0001 |
| 4502165     | Apolipoprotein F                  | 0.46±0.02    | 0.57±0.05  | 0.288       | 0.032   |
| 42761474    | CD59 glycoprotein                 | 0.22±0.01    | 0.20±0.01  | 0.281       | 0.033   |
| 4502161     | Apolipoprotein C-IV               | 0.59±0.05    | 0.57±0.04  | 0.194       | 0.140   |
| 4507725     | Transthyretin                     | 0.24±0.03    | 0.26±0.06  | 0.035       | 0.788   |

**Table S2.** Glycoproteomic results; values for individual samples are intensity units of the peptides. Definition of terms: Xcorr- peptide score, m/z [Da]- mass/charge, and RT (min)- retention time.

Figure S1

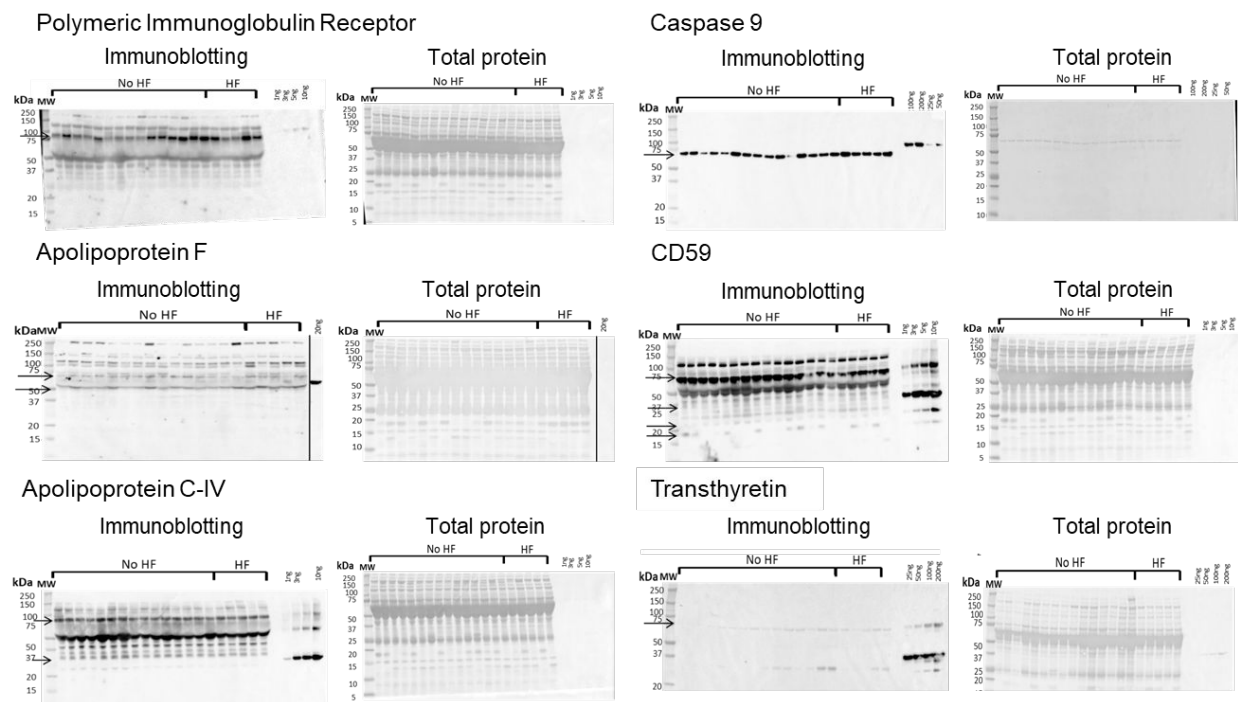

**Figure S1.** Immunoblotting of top 6 proteins identified by glycoproteomics show strong correlation between two proteomic techniques. n=15 no HF and 5 HF.
